# Supplementary material for: HIV-1 integrase inhibitor T30177 forms a stacked dimeric G-quadruplex structure containing bulges
Source: PubMed Central journal article supplement — Nucleic Acids Res. 2011 Jul 19;39(20):8984–91. doi: 10.1093/nar/gkr540 (PMC3203613; doi:10.1093/nar/gkr540), 2011-07-19
Supplement: supp_gkr540_sup22.pdf [file supp_gkr540_sup22.pdf]

# **HIV-1 integrase inhibitor *T30177* forms a stacked dimeric G-quadruplex structure containing bulges**

**Vineeth Thachappilly Mukundan<sup>1</sup>, Ngoc Quang Do<sup>1,2</sup>, and Anh Tuân Phan<sup>1,\*</sup>**

<sup>1</sup>School of Physical and Mathematical Sciences and <sup>2</sup>School of Biological Sciences,  
Nanyang Technological University, Singapore

**Supporting Information**

**Table S1.** Inosine substituted sequences tested in this work

| Name       | Sequences                  |
|------------|----------------------------|
| T30177-I1  | I T GG T GGG T GGG T GGG T |
| T30177-I3  | G T IG T GGG T GGG T GGG T |
| T30177-I4  | G T GI T GGG T GGG T GGG T |
| T30177-I6  | G T GG T IGG T GGG T GGG T |
| T30177-I7  | G T GG T GIG T GGG T GGG T |
| T30177-I8  | G T GG T GGI T GGG T GGG T |
| T30177-I10 | G T GG T GGG T IGG T GGG T |
| T30177-I11 | G T GG T GGG T GIG T GGG T |
| T30177-I12 | G T GG T GGG T GGI T GGG T |
| T30177-I14 | G T GG T GGG T GGG T IGG T |
| T30177-I15 | G T GG T GGG T GGG T GIG T |
| T30177-I16 | G T GG T GGG T GGG T GGI T |

**Table S2.** Site-specific labeled DNA sequences used in this study<sup>a-c</sup>

| Type                    | Sequences      |   |                  |   |                   |   |                   |   |                   |   |
|-------------------------|----------------|---|------------------|---|-------------------|---|-------------------|---|-------------------|---|
| <sup>15</sup> N-labeled | G*             | T | GG               | T | GGG               | T | GIG               | T | GGG               | T |
|                         | G              | T | G*G              | T | GGG               | T | GIG               | T | GGG               | T |
|                         | G              | T | GG*              | T | GGG               | T | GIG               | T | GGG               | T |
|                         | G              | T | GG               | T | G*GG              | T | GIG               | T | GGG               | T |
|                         | G              | T | GG               | T | GG*G              | T | GIG               | T | GGG               | T |
|                         | G              | T | GG               | T | GGG*              | T | GIG               | T | GGG               | T |
|                         | G              | T | GG               | T | GGG               | T | G*IG              | T | GGG               | T |
|                         | G              | T | GG               | T | GGG               | T | GIG*              | T | GGG               | T |
|                         | G              | T | GG               | T | GGG               | T | GIG               | T | G*GG              | T |
|                         | G              | T | GG               | T | GGG               | T | GIG               | T | GG*G              | T |
|                         | G              | T | GG               | T | GGG               | T | GIG               | T | GGG*              | T |
| <sup>2</sup> H-labeled  | G <sup>#</sup> | T | GG               | T | GGG               | T | GIG               | T | GGG               | T |
|                         | G              | T | G <sup>#</sup> G | T | GGG               | T | GIG               | T | GGG               | T |
|                         | G              | T | GG <sup>#</sup>  | T | GGG               | T | GIG               | T | GGG               | T |
|                         | G              | T | GG               | T | G <sup>#</sup> GG | T | GIG               | T | GGG               | T |
|                         | G              | T | GG               | T | GG <sup>#</sup> G | T | GIG               | T | GGG               | T |
|                         | G              | T | GG               | T | GGG <sup>#</sup>  | T | GIG               | T | GGG               | T |
|                         | G              | T | GG               | T | GGG               | T | G <sup>#</sup> IG | T | GGG               | T |
|                         | G              | T | GG               | T | GGG               | T | GIG <sup>#</sup>  | T | GGG               | T |
|                         | G              | T | GG               | T | GGG               | T | GIG               | T | G <sup>#</sup> GG | T |
|                         | G              | T | GG               | T | GGG               | T | GIG               | T | GG <sup>#</sup> G | T |
|                         | G              | T | GG               | T | GGG               | T | GIG               | T | GGG <sup>#</sup>  | T |

<sup>a</sup> Individual guanines 2% -<sup>15</sup>N-labeled are marked by asterisks.

<sup>b</sup> Individual guanines <sup>2</sup>H-labeled at the H8 position are marked by hash signs.

<sup>c</sup> I is Inosine.

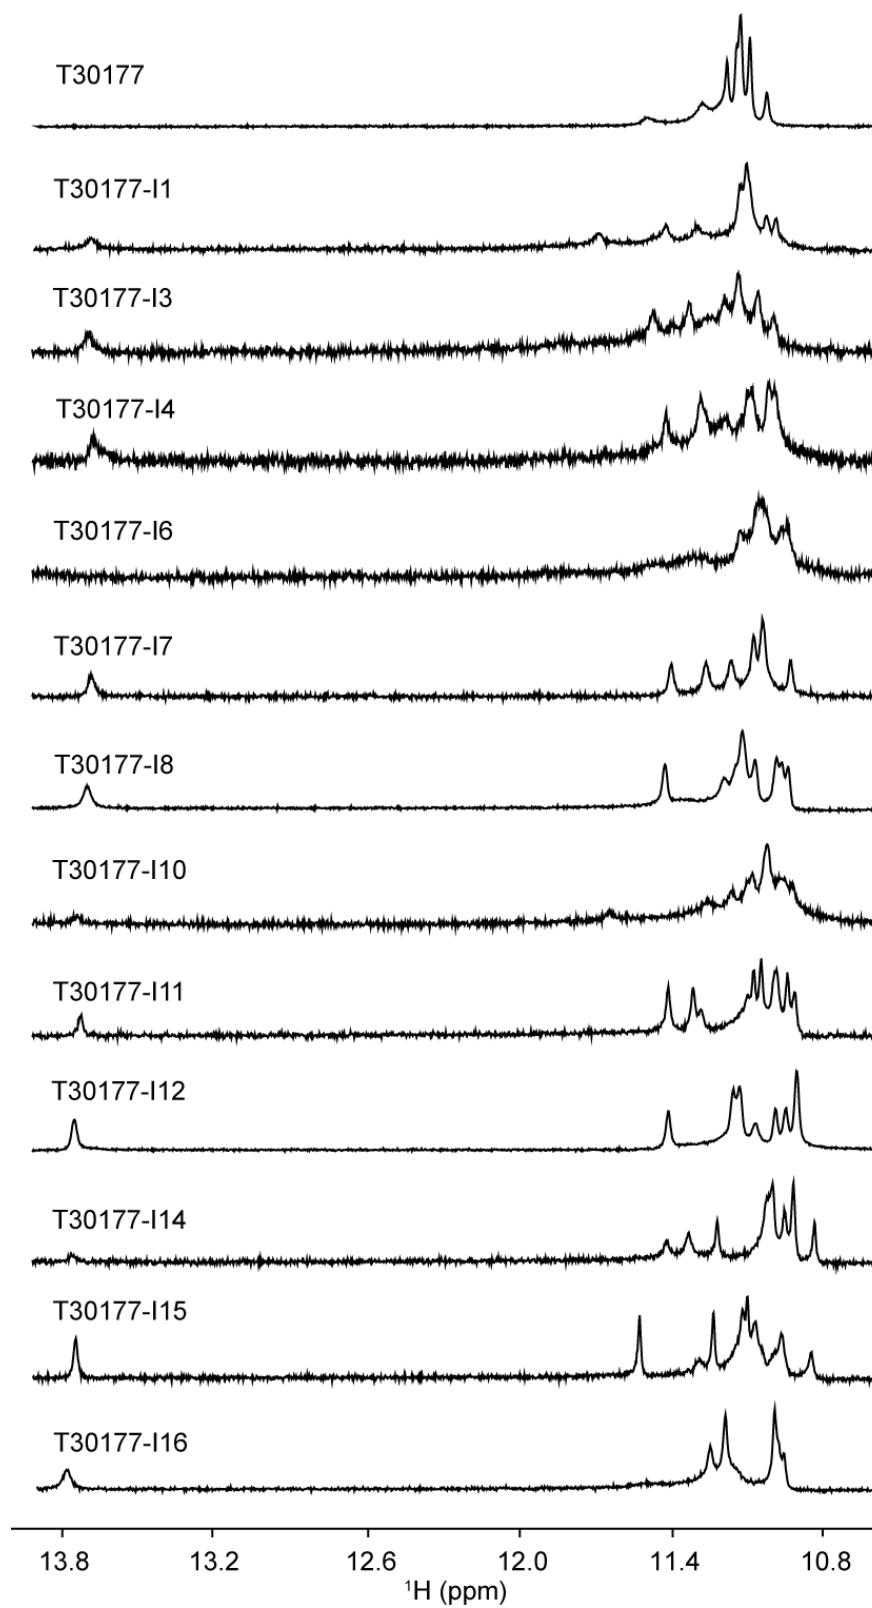

**Figures S1.** Imino proton spectra of *T30177* and guanine-to-inosine substituted sequences.

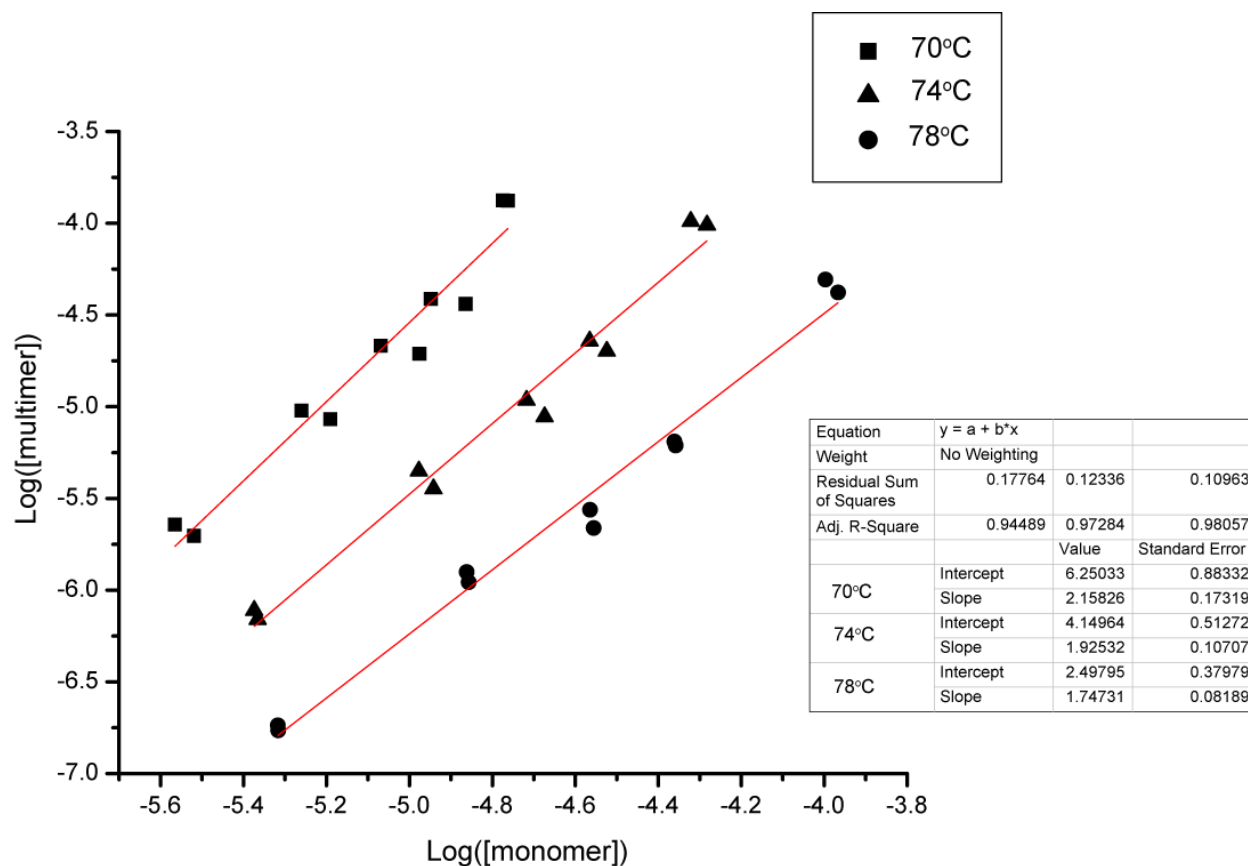

**Figures S2.** Plots of multimer concentrations against monomer concentrations at three different temperatures of *T30177-III* for experiments performed in ~100 mM K<sup>+</sup> solution. Data were obtained from the melting curves in Figure 3a. Concentrations were expressed in Moles before taking logarithms. Lines represent best fits of through the data points. The fitting results are shown on the right.

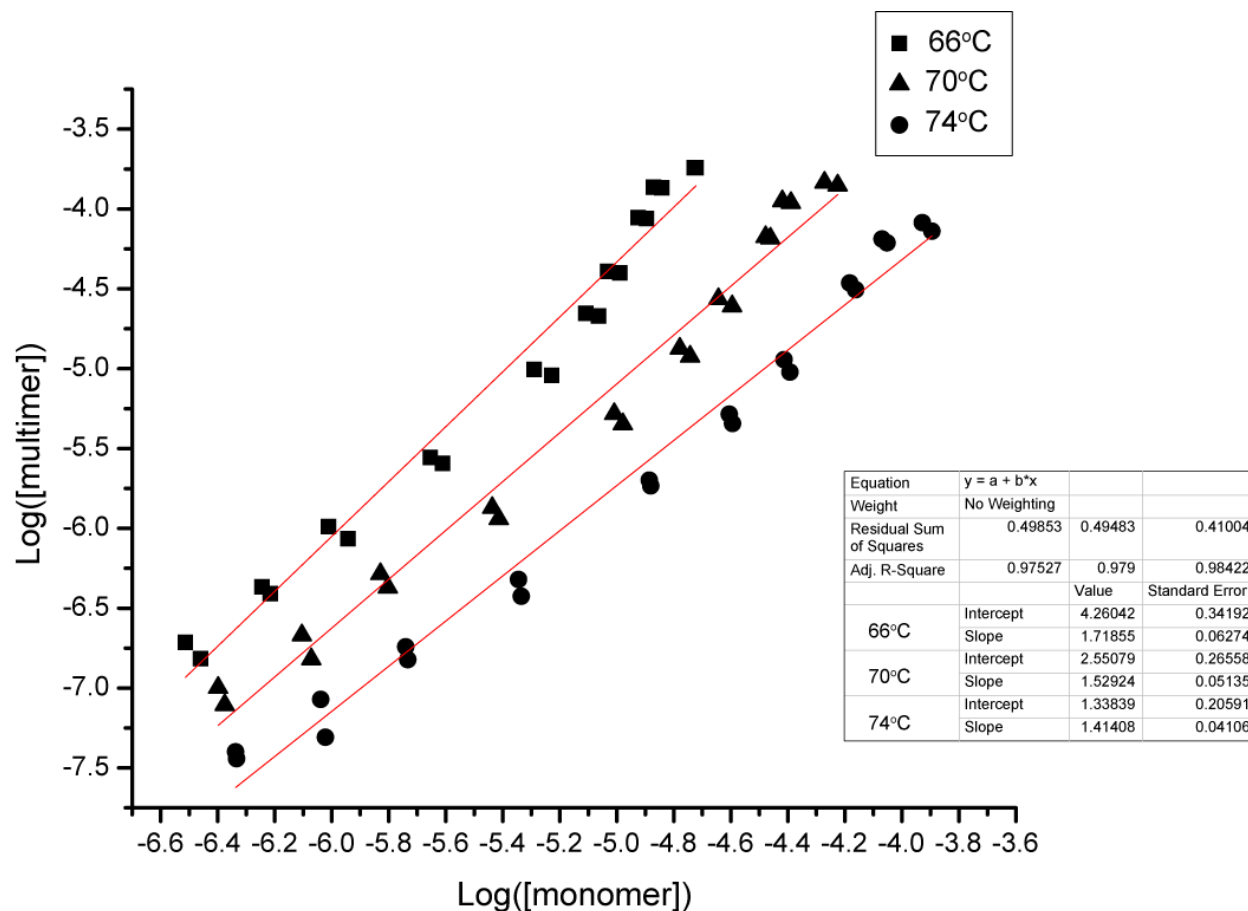

**Figures S3.** Plots of multimer concentrations against monomer concentrations at three different temperatures of *T30177-III* for experiments performed in ~60 mM  $K^+$  solution. Data were obtained from the melting curves in Figure 4a. Concentrations were expressed in Moles before taking logarithms. Lines represent best fits of through the data points. The fitting results are shown on the right.
